# Supplementary material for: Long-term follow-up on biological risk factors, adiposity, and cardiorespiratory fitness development in a physical education intervention: a natural experiment (CHAMPS-study DK)
Source: Springer Nature journal article supplement (doi:10.1186/s12889-018-5524-4), 2018-05-08
Supplement: MOESM4 [file 15751172]

## The TIDieR (Template for Intervention Description and Replication) Checklist\*:

Information to include when describing an intervention and the location of the information

Table S5. TIDieR Checklist

| Item number | Item                                                                                                                                                                                                                                                                                                                         | Where located **                                |                                                                                                 |
|-------------|------------------------------------------------------------------------------------------------------------------------------------------------------------------------------------------------------------------------------------------------------------------------------------------------------------------------------|-------------------------------------------------|-------------------------------------------------------------------------------------------------|
|             |                                                                                                                                                                                                                                                                                                                              | Primary paper (page or appendix number)         | Other † (details)                                                                               |
| 1.          | <p><b>BRIEF NAME</b><br/>Provide the name or a phrase that describes the intervention.</p>                                                                                                                                                                                                                                   | Setting and study design + Intervention content |                                                                                                 |
| 2.          | <p><b>WHY</b><br/>Describe any rationale, theory, or goal of the elements essential to the intervention.</p>                                                                                                                                                                                                                 | Introduction                                    |                                                                                                 |
| 3.          | <p><b>WHAT</b><br/>Materials: Describe any physical or informational materials used in the intervention, including those provided to participants or used in intervention delivery or in training of intervention providers.<br/>Provide information on where the materials can be accessed (e.g. online appendix, URL).</p> | Intervention content (with URL)                 |                                                                                                 |
| 4.          | <p>Procedures: Describe each of the procedures, activities, and/or processes used in the intervention, including any enabling or support activities.</p>                                                                                                                                                                     | Setting and study design + Intervention content | Study protocol: Wedderkopp et al., 2012 – <i>BMC Pediatrics</i> (doi: 10.1186/1471-2431-12-128) |

|                          |                                                                                                                                                                                          |                                                                                                                         |
|--------------------------|------------------------------------------------------------------------------------------------------------------------------------------------------------------------------------------|-------------------------------------------------------------------------------------------------------------------------|
| <b>WHO PROVIDED</b>      |                                                                                                                                                                                          |                                                                                                                         |
| 5.                       | For each category of intervention provider (e.g. psychologist, nursing assistant), describe their expertise, background and any specific training given.                                 | Intervention content                                                                                                    |
| <b>HOW</b>               |                                                                                                                                                                                          |                                                                                                                         |
| 6.                       | Describe the modes of delivery (e.g. face-to-face or by some other mechanism, such as internet or telephone) of the intervention and whether it was provided individually or in a group. | Setting and study design + Intervention content                                                                         |
| <b>WHERE</b>             |                                                                                                                                                                                          |                                                                                                                         |
| 7.                       | Describe the type(s) of location(s) where the intervention occurred, including any necessary infrastructure or relevant features.                                                        | Setting and study design                                                                                                |
| <b>WHEN and HOW MUCH</b> |                                                                                                                                                                                          |                                                                                                                         |
| 8.                       | Describe the number of times the intervention was delivered and over what period of time including the number of sessions, their schedule, and their duration, intensity or dose.        | Setting and study design + Intervention content (with URL)                                                              |
| <b>TAILORING</b>         |                                                                                                                                                                                          |                                                                                                                         |
| 9.                       | If the intervention was planned to be personalised, titrated or adapted, then describe what, why, when, and how.                                                                         | Qualitative analysis:<br>Nielsen et al., <i>in submission</i> :<br>“Implementation of triple the time spent on physical |
| <b>MODIFICATIONS</b>     |                                                                                                                                                                                          |                                                                                                                         |
| 10.*                     | If the intervention was modified during the course of the study, describe the changes (what, why, when, and how).                                                                        |                                                                                                                         |
| <b>HOW WELL</b>          |                                                                                                                                                                                          |                                                                                                                         |
| 11.                      | Planned: If intervention adherence or fidelity was assessed, describe how and by whom, and if any strategies were used to maintain or improve fidelity, describe them.                   |                                                                                                                         |

---

12.‡ Actual: If intervention adherence or fidelity was assessed, describe the extent to which the intervention was delivered as planned.

---

education in  
pre-school to  
6th grade: a  
qualitative  
study”

---

\*\* **Authors** - use N/A if an item is not applicable for the intervention being described. **Reviewers** – use ‘?’ if information about the element is not reported/not sufficiently reported.

† If the information is not provided in the primary paper, give details of where this information is available. This may include locations such as a published protocol or other published papers (provide citation details) or a website (provide the URL).

‡ If completing the TIDieR checklist for a protocol, these items are not relevant to the protocol and cannot be described until the study is complete.

\* We strongly recommend using this checklist in conjunction with the TIDieR guide (see *BMJ* 2014;348:g1687) which contains an explanation and elaboration for each item.

\* The focus of TIDieR is on reporting details of the intervention elements (and where relevant, comparison elements) of a study. Other elements and methodological features of studies are covered by other reporting statements and checklists and have not been duplicated as part of the TIDieR checklist. When a **randomised trial** is being reported, the TIDieR checklist should be used in conjunction with the CONSORT statement (see [www.consort-statement.org](http://www.consort-statement.org)) as an extension of **Item 5 of the CONSORT 2010 Statement**. When a **clinical trial protocol** is being reported, the TIDieR checklist should be used in conjunction with the SPIRIT statement as an extension of **Item 11 of the SPIRIT 2013 Statement** (see [www.spirit-statement.org](http://www.spirit-statement.org)). For alternate study designs, TIDieR can be used in conjunction with the appropriate checklist for that study design (see [www.equator-network.org](http://www.equator-network.org)).
